# Supplementary material for: Extracellular Vesicles Generated by Mesenchymal Stem Cells in Stirred Suspension Bioreactors Promote Angiogenesis in Human-Brain-Derived Endothelial Cells
Source: MDPI journal article supplement (doi:10.3390/ijms25105219), 2024-05-10
Supplement: s1 [file s1]

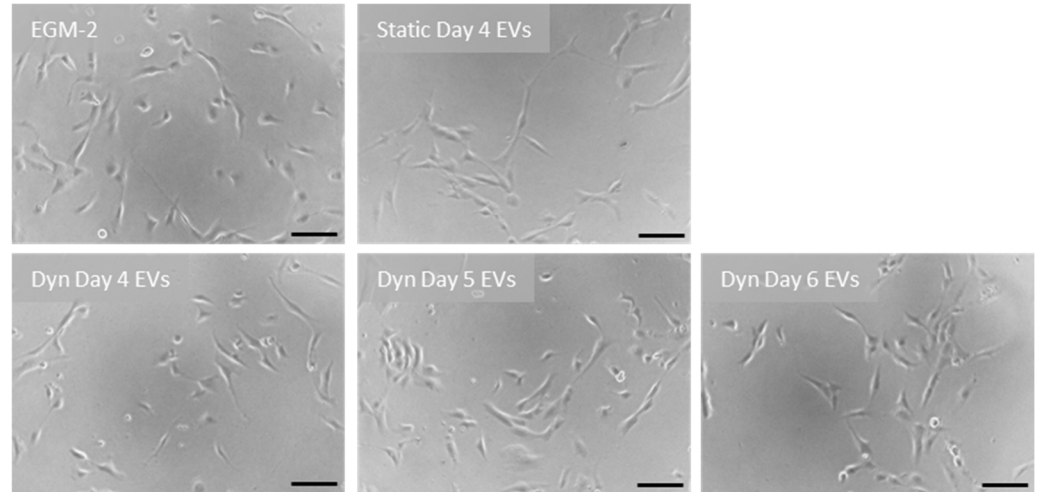

**Figure S1.** Photomicrographs of CMECs 48 h following treatments with EVs resuspended in EGM-2. Scale bar = 100  $\mu$ m. Abbreviations: CMEC, cerebral microvascular endothelial cell; EBM, endothelial basal medium; EGM, endothelial growth medium; EV, extracellular vesicle; MSC, mesenchymal stem cell.

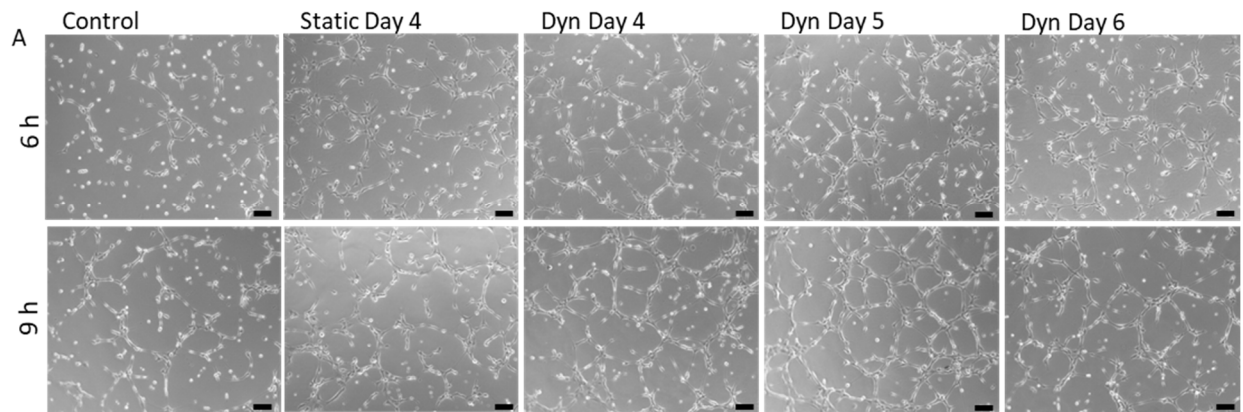

**Figure S2.** Phase contrast images of CMEC tubes formed after 6 and 9 h on a Geltrex matrix exposed to EBM-2 (control), or EBM-2 with the addition of EVs isolated from static MSC cultures on day 4, or SSB (dyn) MSC culture on day 4, 5, or 6 (scale bar = 100  $\mu$ m). Abbreviations: CMEC, cerebral microvascular endothelial cell; EBM, endothelial basal medium; EV, extracellular vesicle; MSC, mesenchymal stem cell.
